# Supplementary material for: mHealth Interventions to Address Physical Activity and Sedentary Behavior in Cancer Survivors: A Systematic Review
Source: MDPI journal article supplement (doi:10.3390/ijerph18115798), 2021-05-28
Supplement: s1 [file s1]

## Search strategy

Limit: 2000 - 13 April 2020

|                                                                                                                                                                                                                                                                                                                                                                                                                         |
|-------------------------------------------------------------------------------------------------------------------------------------------------------------------------------------------------------------------------------------------------------------------------------------------------------------------------------------------------------------------------------------------------------------------------|
| 'cancer' population                                                                                                                                                                                                                                                                                                                                                                                                     |
| cancer OR neoplasm OR tumour OR carcinoma OR malignancy                                                                                                                                                                                                                                                                                                                                                                 |
| 'mHealth' intervention method                                                                                                                                                                                                                                                                                                                                                                                           |
| app* OR 'mobile health' OR mHealth OR 'electronic health' OR eHealth OR smartphone OR 'mobile phone' OR 'cell phone' OR internet OR wearable* OR tracker* OR technology OR teleHealth OR telerehabilitation OR telemedicine OR 'short message service' OR SMS OR 'multimedia messaging service' OR MMS OR 'text message'                                                                                                |
| 'physical activity' or 'sedentary behaviour' outcome variable                                                                                                                                                                                                                                                                                                                                                           |
| exercise OR 'physical exercise' OR 'physical activit*' OR 'exercise therap*' OR 'motor function' OR 'motor activit*' OR kinesiotherapy OR 'aerobic exercise' OR run* OR jog* OR walk* OR sport* OR fitness OR workout OR 'outdoor activit*' OR 'active transport' OR 'movement therapy' OR 'physical fitness' OR sedentar* OR 'sedentary behaviour' OR sit* OR inactive* OR recline* OR stationary OR seated OR screen* |
