# Supplementary material for: mHealth Interventions to Address Physical Activity and Sedentary Behavior in Cancer Survivors: A Systematic Review
Source: MDPI journal article supplement (doi:10.3390/ijerph18115798), 2021-05-28
Supplement: s1 [file s1]

## Risk of Bias Summary

| RCT studies*        |                         |                                   |                                         |                                                    |                            |                                  |                                          |                   |
|---------------------|-------------------------|-----------------------------------|-----------------------------------------|----------------------------------------------------|----------------------------|----------------------------------|------------------------------------------|-------------------|
| First Author        | Randomization process   |                                   | Deviations from intended interventions  | Missing outcome data                               | Measurement of the outcome | Selection of the reported result |                                          | Overall judgement |
| Cadmus-Bertram [42] | +                       |                                   | +                                       | +                                                  | +                          | +                                |                                          | +                 |
| Gell [44]           | +                       |                                   | +                                       | +                                                  | +                          | ?                                |                                          | ?                 |
| Haggerty [48]       | +                       |                                   | +                                       | ?                                                  | -                          | +                                |                                          | -                 |
| Hartman [52]        | +                       |                                   | +                                       | +                                                  | +                          | +                                |                                          | +                 |
| Kenfield [47]       | +                       |                                   | +                                       | +                                                  | +                          | +                                |                                          | +                 |
| Lynch [38,39]       | +                       |                                   | +                                       | +                                                  | +                          | +                                |                                          | +                 |
| Maxwell-Smith [56]  | +                       |                                   | +                                       | +                                                  | +                          | +                                |                                          | +                 |
| Mayer [46]          | ?                       |                                   | +                                       | +                                                  | +                          | +                                |                                          | ?                 |
| McNeil [61]         | +                       |                                   | +                                       | +                                                  | +                          | +                                |                                          | +                 |
| Mendoza [40]        | +                       |                                   | +                                       | +                                                  | +                          | +                                |                                          | +                 |
| Ormel [65]          | +                       |                                   | +                                       | +                                                  | ?                          | +                                |                                          | ?                 |
| Pope [49]           | +                       |                                   | +                                       | +                                                  | +                          | +                                |                                          | +                 |
| Singh [53]          | +                       |                                   | +                                       | +                                                  | ?                          | +                                |                                          | ?                 |
| Van Blarigan [69]   | +                       |                                   | +                                       | +                                                  | +                          | +                                |                                          | +                 |
| Valle [51]          | +                       |                                   | +                                       | +                                                  | +                          | +                                |                                          | +                 |
| Villaron [64]       | ?                       |                                   | +                                       | +                                                  | +                          | ?                                |                                          | -                 |
| Non RCT**           |                         |                                   |                                         |                                                    |                            |                                  |                                          |                   |
| First Author        | Bias due to confounding | Bias in selection of participants | Bias in classification of interventions | Bias due to deviations from intended interventions | Bias due to missing data   | Bias in measurement of outcomes  | Bias in selection of the reported result | Overall judgement |
| Cheong [59]         | ?                       | /                                 | /                                       | /                                                  | ?                          | -                                | +                                        | -                 |
| Chung [58]          | N/I                     | /                                 | +                                       | +                                                  | /                          | -                                | +                                        | N/I               |
| Delrieu [63]        | -                       | /                                 | +                                       | +                                                  | /                          | -                                | +                                        | -                 |
| Gell [43]           | N/I                     | /                                 | +                                       | +                                                  | +                          | -                                | +                                        | N/I               |
| Götte [66]          | ?                       | /                                 | /                                       | +                                                  | +                          | -                                | +                                        | -                 |
| Kim [60]            | N/I                     | /                                 | +                                       | +                                                  | ?                          | -                                | +                                        | N/I               |
| Le [41]             | N/I                     | /                                 | /                                       | /                                                  | /                          | -                                | +                                        | N/I               |
| Lozano-Lozano [67]  | N/I                     | /                                 | +                                       | +                                                  | +                          | -                                | +                                        | N/I               |
| McCarroll [50]      | N/I                     | /                                 | +                                       | +                                                  | +                          | -                                | +                                        | N/I               |
| Ovans [45]          | ?                       | /                                 | +                                       | +                                                  | ?                          | -                                | +                                        | -                 |
| Puszkiewicz [68]    | ?                       | /                                 | +                                       | +                                                  | +                          | -                                | +                                        | -                 |
| Short [55]          | N/I                     | /                                 | +                                       | N/I                                                | ?                          | -                                | +                                        | N/I               |
| Spark [54]          | ?                       | /                                 | +                                       | +                                                  | /                          | -                                | +                                        | -                 |
| Trinh [62]          | N/I                     | /                                 | +                                       | +                                                  | /                          | -                                | +                                        | N/I               |
| Uhm [57]            | /                       | /                                 | +                                       | +                                                  | +                          | ?                                | +                                        | ?                 |

\*Assessed using RoB2.0; low risk of bias (+); some concerns (?); high risk of bias (-)

\*\*Assessed using ROBINS-I; low risk of bias (+), moderate risk of bias (/), serious risk of bias (?), critical risk of bias (-), No information (N/I)
